# Supplementary material
Source: MDPI journal article supplement (https://www.mdpi.com/2073-4441/14/7/1021)
Supplement: s1 [file s1]

**Table S1.** Description of satellite images used

| Year | Season | Date          | Image ID                                 | Sun azimuth | Sun elevation | Earth-Sun distance |
|------|--------|---------------|------------------------------------------|-------------|---------------|--------------------|
| 2006 | Dry    | May 5th       | LE07_L1TP_001071_20060526_20200914_02_T1 | 40,38       | 41,95         | 1,01               |
|      |        |               | LE07_L1TP_001072_20060526_20200914_02_T1 | 39,77       | 40,7          | 1,01               |
|      | Wet    | October 1st   | LE07_L1TP_001071_20061001_20200913_02_T1 | 69,58       | 58,42         | 1                  |
|      |        |               | LE07_L1TP_001072_20061001_20200913_02_T1 | 67,61       | 57,69         | 1                  |
| 2009 | Dry    | September 7th | LE07_L1TP_001071_20090907_20200912_02_T1 | 57,25       | 52,2          | 1                  |
|      |        |               | LE07_L1TP_001072_20090907_20200911_02_T1 | 55,94       | 51,22         | 1                  |
|      | Wet    | March 15th    | LE07_L1TP_001071_20090315_20200912_02_T1 | 70,76       | 53,76         | 0,99               |
|      |        |               | LE07_L1TP_001072_20090315_20200912_02_T1 | 69,1        | 53,06         | 0,99               |
| 2012 | Dry    | June 27th     | LE07_L1TP_001071_20120627_20200909_02_T1 | 38,82       | 40,2          | 1,01               |
|      |        |               | LE07_L1TP_001072_20120627_20200908_02_T1 | 38,28       | 38,94         | 1,01               |
|      | Wet    | October 1st   | LE07_L1TP_001071_20121001_20200908_02_T1 | 68,43       | 60,04         | 1                  |
|      |        |               | LE07_L1TP_001072_20121001_20200908_02_T1 | 66,36       | 59,29         | 1                  |
| 2015 | Dry    | May 3rd       | LE07_L1TP_001071_20150503_20200904_02_T1 | 43,17       | 47,6          | 1                  |
|      |        |               | LE07_L1TP_001072_20150503_20200904_02_T1 | 42,36       | 46,39         | 1                  |
|      | Wet    | December 13th | LE07_L1TP_001071_20151213_20200903_02_T1 | 110         | 63,13         | 0,98               |
|      |        |               | LE07_L1TP_001072_20151213_20200903_02_T1 | 107,21      | 63,38         | 0,98               |
| 2018 | Dry    | August 31st   | LE07_L1TP_001071_20180831_20200828_02_T1 | 52,41       | 51,73         | 1                  |
|      |        |               | LE07_L1TP_001072_20180831_20200828_02_T1 | 51,23       | 50,67         | 1                  |
|      | Wet    | October 2nd   | LE07_L1TP_001071_20181002_20200828_02_T1 | 68,32       | 60,62         | 1                  |
|      |        |               | LE07_L1TP_001072_20181002_20200828_02_T1 | 66,2        | 59,87         | 1                  |

**Table S2.** Mann-Kendall and Sen's slopes results for land cover classes

| Land cover classes | Kendall's tau | <i>p</i> -value | Trend             | Sen's slope |
|--------------------|---------------|-----------------|-------------------|-------------|
| Water              | -0,4          | 0,462           | No trend          | 3,751       |
| Built Up           | 1             | 0,027           | <i>Increasing</i> | 24,069      |
| Vegetation         | -0,6          | 0,2206          | No trend          | -7,598      |

|              |      |        |          |        |
|--------------|------|--------|----------|--------|
| Barren Land  | -0,4 | 0,4624 | No trend | -66,99 |
| Shrubs/Grass | 0,2  | 0,806  | No trend | 33,565 |
| Snow Cover   | 0,2  | 0,806  | No trend | 1,82   |

**Table S3.** Extent of high NDVI, NDAVI, and SAVI areas in km<sup>2</sup> for the study period

|       |     | 2006 | 2009 | 2012 | 2015 | 2018 |
|-------|-----|------|------|------|------|------|
| NDVI  | Dry | 52,8 | 71,6 | 74,1 | 76,5 | 81,3 |
|       | Wet | 57,2 | 64,1 | 66,7 | 78,9 | 83,2 |
| NDAVI | Dry | 60,9 | 75,4 | 76,1 | 78,9 | 82,1 |
|       | Wet | 62,5 | 65,1 | 78,2 | 81,2 | 82,9 |
| SAVI  | Dry | 47,2 | 52,5 | 54,0 | 56,6 | 58,7 |
|       | Wet | 42,1 | 47,3 | 50,5 | 53,6 | 56,2 |

**Table S4.** Mann-Kendall and Sen's slopes results for SAVI, NDVI, and NDAVI

| Indices   | Kendall's tau | <i>p</i> -value | Trend             | Sen's slope |
|-----------|---------------|-----------------|-------------------|-------------|
| NDVI Dry  | 1             | 0,02748         | <i>Increasing</i> | 4,19        |
| NDVI Wet  | 1             | 0,02748         | <i>Increasing</i> | 6,69        |
| NDAVI Dry | 1             | 0,02748         | <i>Increasing</i> | 3,09        |
| NDAVI Wet | 1             | 0,02748         | <i>Increasing</i> | 5,516       |
| SAVI Dry  | 1             | 0,02748         | <i>Increasing</i> | 2,467       |
| SAVI Wet  | 1             | 0,02748         | <i>Increasing</i> | 3,192       |
